# Supplementary material for: Binary V–Mo sulfides grown on CNTs with morphological and electronic modulation for enhanced hydrogen evolution
Source: Royal Society of Chemistry journal article supplement (doi:10.1039/d1ce00938a), 2021-01-01
Supplement: d1ce00938a1.pdf [file d1ce00938a1.pdf]

## Electronic Supplementary Information

### **Binary V-Mo sulfides grown on CNTs with morphological and electronic modulation for enhanced hydrogen evolution**

Xianpei Ren <sup>a,b,c,\*</sup>, Qingbo Wei <sup>d,\*</sup>, Fei Wu <sup>a</sup>, Yonghua Wang <sup>a</sup>, Qiang Li <sup>a</sup>

<sup>a</sup>Laboratory of Micro-Nano Photoelectric Materials and Devices, School of Physics and Electronic Engineering, Sichuan University of Science and Engineering, Zigong 643000, China

<sup>b</sup>Key Laboratory of Advanced Energy Materials Chemistry (Ministry of Education), College of Chemistry, Nankai University, Tianjin 300071, China.

<sup>c</sup>Solar Energy Integration Technology Popularization and Application Key Laboratory of Sichuan Province, Panzhihua, 617000, China

<sup>d</sup>Key Laboratory of Chemical Reaction Engineering of Shaanxi Province; College of Chemistry & Chemical Engineering, Yan'an University, Yan'an 716000, China

\*Corresponding author: E-mail: renxianpei@163.com; E-mail: qbwei2011@126.com.

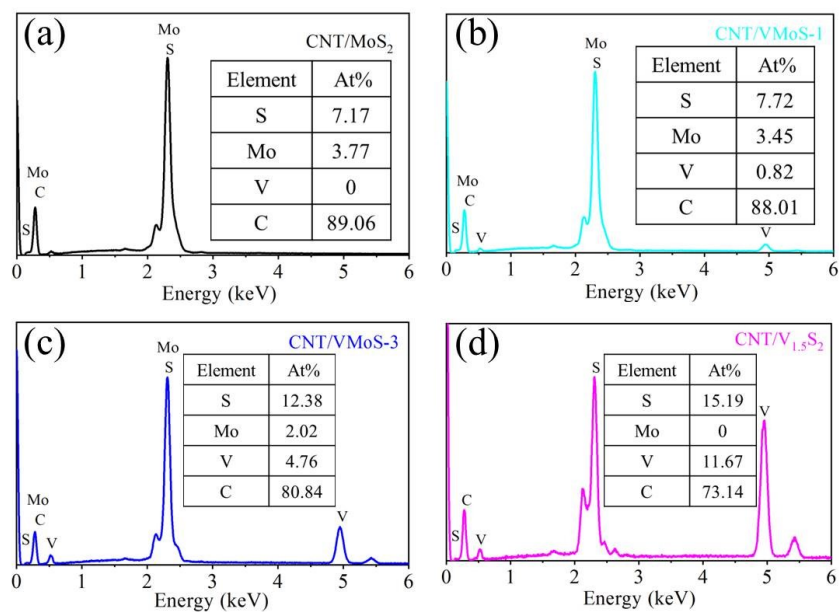

**Fig. S1.** EDS pattern of (a) CNT/MoS<sub>2</sub>, (b) CNT/VMoS-1, (c) CNT/VMoS-3 and (d) CNT/V<sub>1.5</sub>S<sub>2</sub>. Insets are the corresponding atomic%.

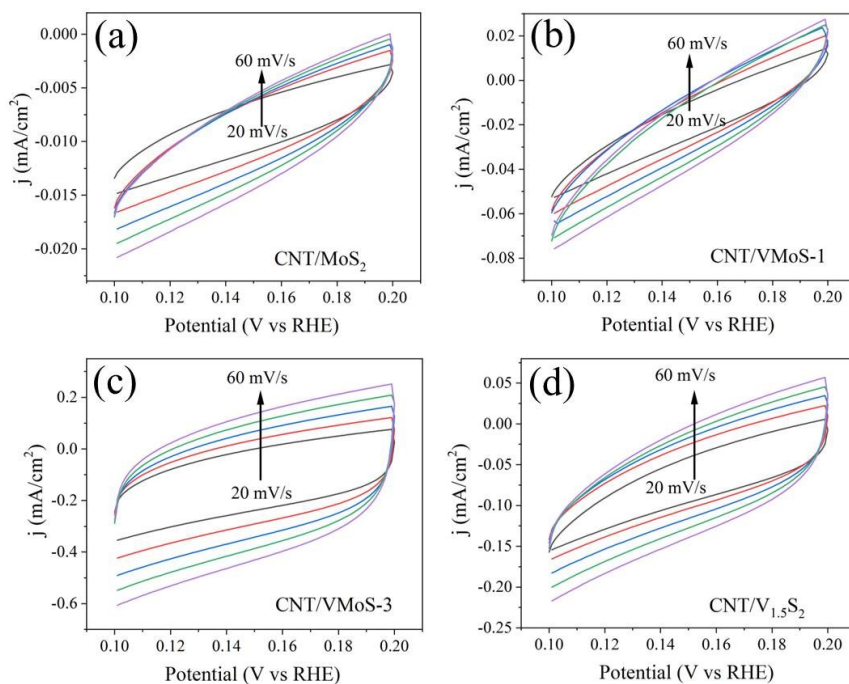

**Fig. S2.** (a-d) Electrochemical cyclic voltammogram of as-grown catalysts at different potential scanning rates. The scan rates are 20, 30, 40, 50 and 60 mV/s. The selected potential range where no faradic current was observed is 0.10 to 0.2 V vs RHE.

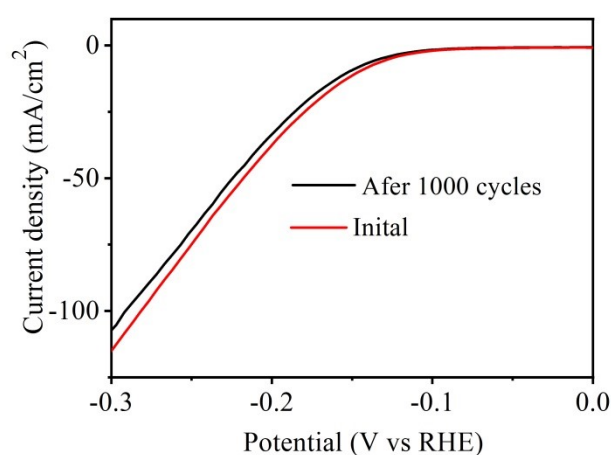

**Fig. S3.** Stability of CNT/VMoS-2 in 0.5 M  $\text{H}_2\text{SO}_4$  solution after 1000 cycles. The slight degradation indicating that the catalyst is stable in electrochemical process.
